# Supplementary material
Source: Springer Nature journal article supplement (https://www.springermedizin.de/resource/supplementary/12958_2013_1093_MOESM2_ESM.pdf/9566786)
Supplement: MOESM2 [file 9566786]

Recurrent implantation failures  
(n = 597)

← MMP test recommend

Agreed to test  
(n = 360)

Declined test

← First MMP test

(Group C, n = 237)

MMP score  $\geq 5$   
(Group P)

MMP score  $< 4$   
(Group N)

← Treatment

← Second MMP test

MMP score  $\geq 5$   
(Group Pr)

MMP score  $< 4$   
(Group Pe)

Next embryo transfer and evaluation of clinical pregnancy and miscarriage rates
